# Supplementary material for: Using Colistin as a Trojan Horse: Inactivation of Gram-Negative Bacteria with Chlorophyllin
Source: MDPI journal article supplement (doi:10.3390/antibiotics8040158), 2019-09-20
Supplement: s1 [file s1]

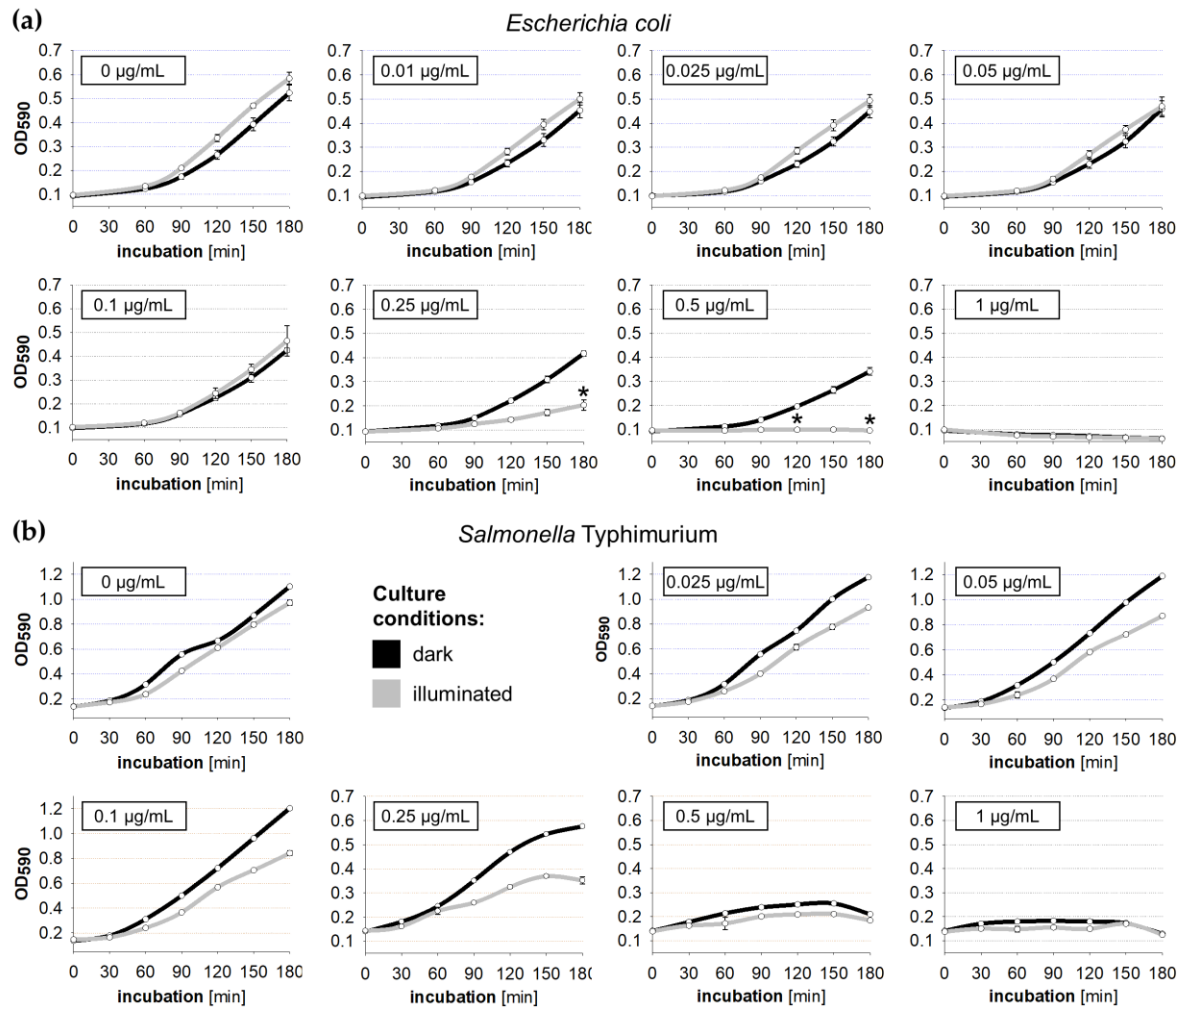

**Figure S1.** Possible additive effect of colistin and light on the proliferation rate of (a) *E. coli* DH5 $\alpha$  and (b) *S. Typhimurium*. LB was supplemented with different colistin concentrations. Cells grew either illuminated with 12 mW/cm<sup>2</sup> (grey lines) or protected from light (black lines). Depicted are measured values (circles) and fitted curves (lines)  $\pm$  standard deviations ( $n = 3$ ) showing one representative of three independent experiments. \*:  $p < 0.05$  vs. not-illuminated-free samples.

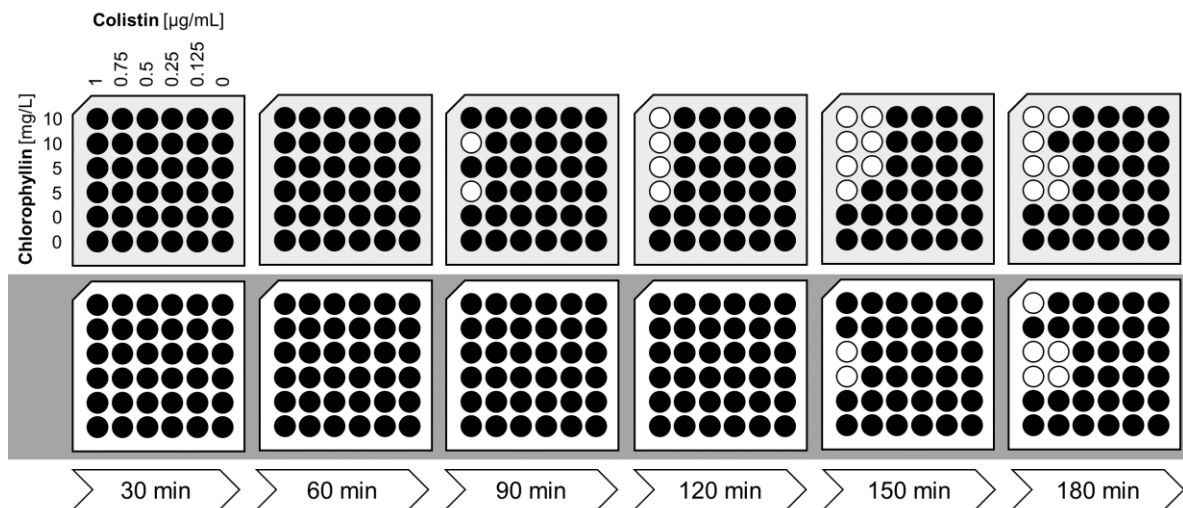

**Figure S2.** Growth kinetic of *E. coli* DH5 $\alpha$  in the presence of chlorophyllin/colistin concentrations. Liquid cultures containing chlorophyllin and/or colistin were exposed to light (upper row) or were protected from light (lower row; grey). In 30-minute intervals, 5  $\mu\text{L}$  samples of were transferred into new 48 well plates with LB medium without supplementations. Cell growth was checked after further 24 h incubation estimating the turbidity of the medium inside the wells. Black circles indicate turbidity (=living cells), white circles no turbidity (=no living cells).

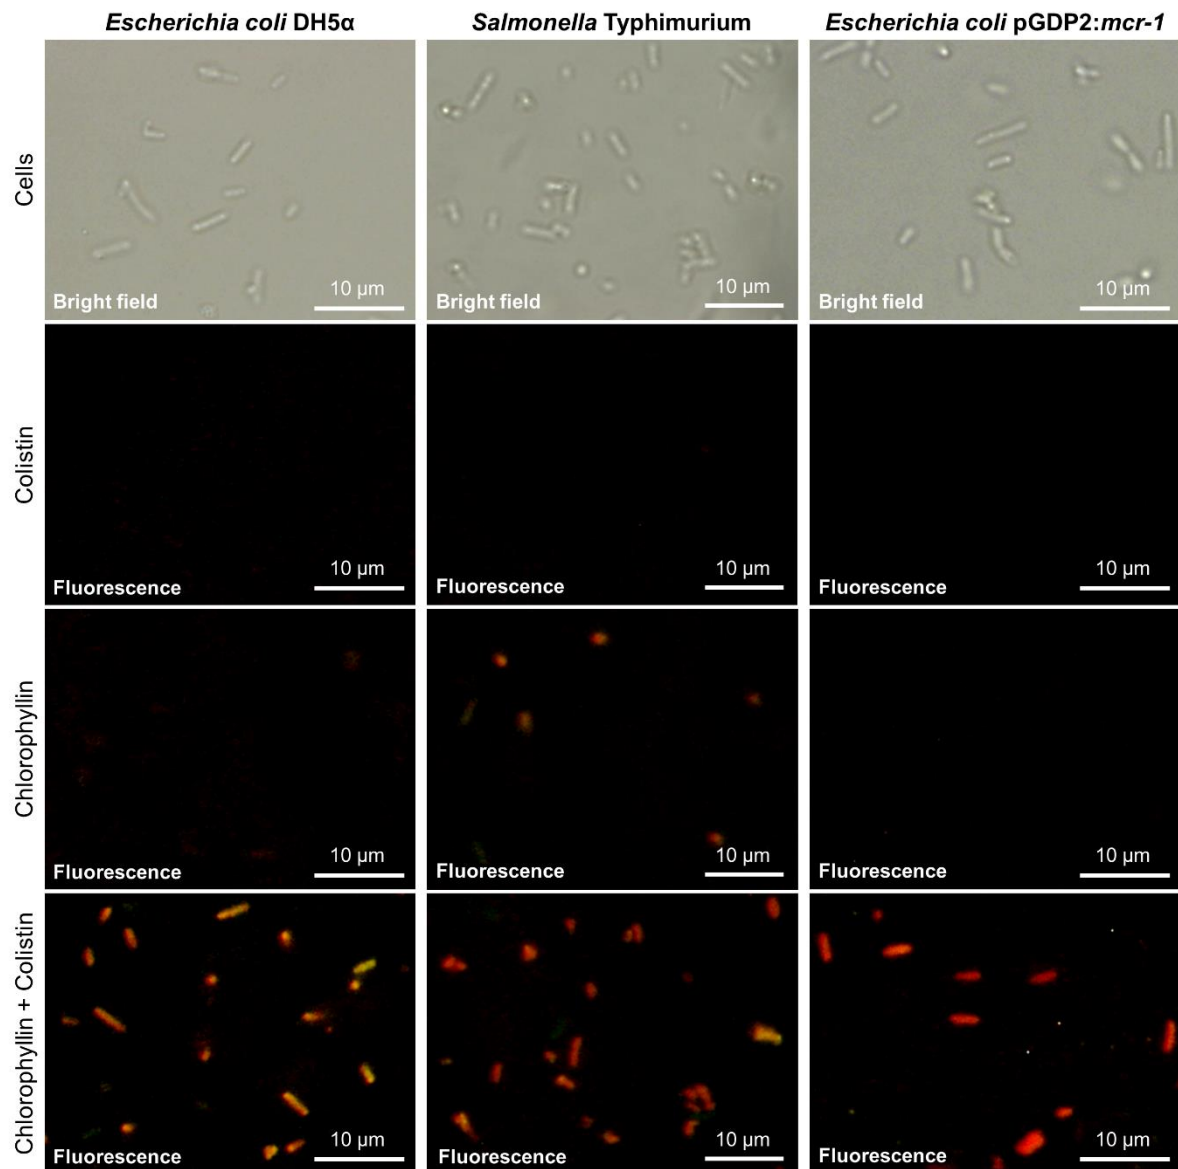

**Figure S3.** Chlorophyllin uptake into *E. coli*, *S. Typhimurium* and *E. coli* pGDP2:*mcr-1* in the presence of colistin. Samples were taken from liquid cultures after 24 h of incubation in darkness and microscopically analyzed in bright field (first row) and under blue light fluorescence. Red fluorescence is emitted from chlorophyllin inside the cells. Scale bars: 10  $\mu$ m.

**Table S1.** Effects of different colistin concentrations on the growth of *E. coli* DH5 $\alpha$ . Given are OD<sub>590</sub> values  $\pm$  standard deviations (n = 3) showing one representative of three independent experiments.

| Time<br>[min] | Colistin concentrations [ $\mu$ g/mL] |                      |                      |                      |                      |                      |                      |                      |                      |                      |
|---------------|---------------------------------------|----------------------|----------------------|----------------------|----------------------|----------------------|----------------------|----------------------|----------------------|----------------------|
|               | 0.000                                 | 0.005                | 0.010                | 0.015                | 0.050                | 0.100                | 0.250                | 0.500                | 1.000                | 2.500                |
| 0             | 0.097<br>$\pm$ 0.001                  | 0.098<br>$\pm$ 0.003 | 0.099<br>$\pm$ 0.002 | 0.097<br>$\pm$ 0.001 | 0.098<br>$\pm$ 0.001 | 0.102<br>$\pm$ 0.003 | 0.093<br>$\pm$ 0.002 | 0.097<br>$\pm$ 0.002 | 0.100<br>$\pm$ 0.001 | 0.099<br>$\pm$ 0.001 |
| 60            | 0.134<br>$\pm$ 0.004                  | 0.124<br>$\pm$ 0.004 | 0.121<br>$\pm$ 0.002 | 0.122<br>$\pm$ 0.002 | 0.120<br>$\pm$ 0.001 | 0.119<br>$\pm$ 0.003 | 0.107<br>$\pm$ 0.003 | 0.095<br>$\pm$ 0.002 | 0.076<br>$\pm$ 0.001 | 0.078<br>$\pm$ 0.001 |
| 90            | 0.210<br>$\pm$ 0.007                  | 0.186<br>$\pm$ 0.008 | 0.177<br>$\pm$ 0.005 | 0.174<br>$\pm$ 0.006 | 0.168<br>$\pm$ 0.010 | 0.161<br>$\pm$ 0.006 | 0.125<br>$\pm$ 0.003 | 0.099<br>$\pm$ 0.001 | 0.071<br>$\pm$ 0.001 | 0.075<br>$\pm$ 0.001 |
| 120           | 0.335<br>$\pm$ 0.015                  | 0.302<br>$\pm$ 0.011 | 0.282<br>$\pm$ 0.013 | 0.285<br>$\pm$ 0.014 | 0.271<br>$\pm$ 0.015 | 0.244<br>$\pm$ 0.021 | 0.143<br>$\pm$ 0.008 | 0.099<br>$\pm$ 0.003 | 0.068<br>$\pm$ 0.000 | 0.070<br>$\pm$ 0.001 |
| 150           | 0.470<br>$\pm$ 0.008                  | 0.414<br>$\pm$ 0.015 | 0.394<br>$\pm$ 0.022 | 0.391<br>$\pm$ 0.023 | 0.374<br>$\pm$ 0.017 | 0.344<br>$\pm$ 0.021 | 0.172<br>$\pm$ 0.013 | 0.100<br>$\pm$ 0.005 | 0.066<br>$\pm$ 0.001 | 0.067<br>$\pm$ 0.001 |
| 180           | 0.584<br>$\pm$ 0.025                  | 0.529<br>$\pm$ 0.024 | 0.500<br>$\pm$ 0.025 | 0.493<br>$\pm$ 0.026 | 0.470<br>$\pm$ 0.038 | 0.465<br>$\pm$ 0.064 | 0.203<br>$\pm$ 0.021 | 0.096<br>$\pm$ 0.006 | 0.062<br>$\pm$ 0.001 | 0.063<br>$\pm$ 0.001 |
